# Supplementary material for: Early immune responses to systemic inflammation in the postnatal mouse brain initiated by migrating macrophages and leptomeningeal fibroblasts
Source: Research Square preprint supplement (doi:10.21203/rs.3.rs-6850479/v1), 2025-06-25
Supplement: Supplementary file 1 [file 9aca565bdbd7a0b4f3a36148.docx]

**Table 1.** Primary antibodies for immunohistochemical staining

Primary Cells/molecules Species Catalogue number/company Dilution

antibody identified

CCL2 chemokine goat poly-IgG AF-479-NA/R&D 1:200

Type 1 Collagen collagen subtype rabbit mono-IgG ab270993/abcam 1:100

GFAP astrocyte rabbit poly-IgG IR524/Dako ready to use

Iba1 macrophage/microglia rabbit mono-IgG ab178846/abcam 1:2500

IL-1β cytokine goat poly-IgG AF-401-NA/R&D 1:5000

IL-1R1 cytokine receptor goat poly-IgG AF771/R&D 1:50

S-100β astrocyte rabbit mono-IgG ab52642/abcam 1:500
